# Supplementary material for: Effects of landscape anthropization on mosquito community composition and abundance
Source: PubMed Central journal article supplement (PMC4931447; doi:10.1038/srep29002), 2016-07-04
Supplement: srep29002-s1.pdf [file srep29002-s1.pdf]

# Supplementary Information

## **Effects of landscape anthropization on mosquito community composition and abundance**

Martina Ferraguti<sup>1\*</sup>, Josué Martínez-de la Puente<sup>1,4</sup>, David Roiz<sup>1,2</sup>, Santiago Ruiz<sup>3,4</sup>,  
Ramón Soriguer<sup>1,4</sup>, Jordi Figuerola<sup>1,4</sup>

<sup>1</sup> Estación Biológica de Doñana (EBD-CSIC), Seville (Spain).

<sup>2</sup> Present address: Infectious Diseases and Vectors: Ecology, Genetics, Evolution and Control. IRD (Institut de Recherche pour le Développement), Montpellier (France).

<sup>3</sup> Diputación de Huelva, Área de Medio Ambiente, Servicio de Control de Mosquitos, Huelva (Spain).

<sup>4</sup> CIBER Epidemiología y Salud Pública (CIBERESP) (Spain).

\* Corresponding author

M.F. E-mail: [mferraguti@ebd.csic.es](mailto:mferraguti@ebd.csic.es) Tel.: (+34) 954466700, Fax: (+34) 954621125.

**Supplementary Table S1** – Mosquito mean abundance, species richness and diversity for each locality.

| <b>Province</b> | <b>Trio</b>           | <b>Habitat category</b> | <b>Locality</b>                                       | <b>Abundance</b> | <b>Richness</b> | <b>Diversity</b> |
|-----------------|-----------------------|-------------------------|-------------------------------------------------------|------------------|-----------------|------------------|
| Cádiz           | Chipiona              | Natural                 | Centro de Interpretación de la Naturaleza El Camaleón | 19.64            | 6               | 0.37             |
| Cádiz           | Chipiona              | Rural                   | Hípica La Garrocha                                    | 13.06            | 4               | 0.42             |
| Cádiz           | Chipiona              | Urban                   | Colegio Público Lapachar                              | 11.94            | 4               | 0.12             |
| Cádiz           | Jerez                 | Natural                 | Laguna de Medina                                      | 35.39            | 7               | 0.41             |
| Cádiz           | Jerez                 | Rural                   | Yeguada Hierro del Bocado                             | 40.06            | 6               | 0.51             |
| Cádiz           | Jerez                 | Urban                   | OCA La Campiña                                        | 13.61            | 6               | 0.17             |
| Cádiz           | Puerto de Santa Maria | Natural                 | Centro de Interpretación Casa de los Toruños          | 105.67           | 9               | 0.54             |
| Cádiz           | Puerto de Santa Maria | Rural                   | Granja Carretera del Juncal                           | 32.81            | 8               | 0.63             |
| Cádiz           | Puerto de Santa Maria | Urban                   | Camping Puerto de Santa María                         | 22.69            | 7               | 0.42             |
| Cádiz           | Rota                  | Natural                 | Punta Candor                                          | 40.89            | 7               | 0.54             |
| Cádiz           | Rota                  | Rural                   | Granja-corrál                                         | 4.89             | 5               | 0.61             |
| Cádiz           | Rota                  | Urban                   | Camping Aguadulce                                     | 27.00            | 6               | 0.17             |
| Cádiz           | Sanlucar Barrameda    | Natural                 | Pinar de la Algaida                                   | 1106.33          | 9               | 0.54             |
| Cádiz           | Sanlucar Barrameda    | Rural                   | Granja en la Algaida                                  | 48.83            | 7               | 0.63             |
| Cádiz           | Sanlucar Barrameda    | Urban                   | Palacio Duquesa Medina Sidonia                        | 10.56            | 4               | 0.44             |
| Huelva          | Beas                  | Natural                 | Dehesa                                                | 64.30            | 10              | 0.36             |
| Huelva          | Beas                  | Rural                   | Ganadería Pan y Ajo                                   | 9.40             | 7               | 0.56             |
| Huelva          | Beas                  | Urban                   | Restaurante El Olivo                                  | 6.53             | 5               | 0.35             |
| Huelva          | Doñana                | Natural                 | Control acceso                                        | 4640.50          | 8               | 0.07             |
| Huelva          | Doñana                | Rural                   | Palacio de Doñana                                     | 5780.89          | 9               | 0.10             |
| Huelva          | Doñana                | Urban                   | Oficina SEO en El Rocío                               | 43.56            | 8               | 0.57             |
| Huelva          | Gibraleón             | Natural                 | Alcornocal de San Isidro                              | 203.92           | 8               | 0.35             |
| Huelva          | Gibraleón             | Rural                   | Granja                                                | 35.00            | 8               | 0.49             |
| Huelva          | Gibraleón             | Urban                   | Casa particular                                       | 9.61             | 5               | 0.32             |
| Huelva          | Huelva                | Natural                 | Centro de Interpretación Calatilla                    | 129.58           | 8               | 0.62             |

|         |                     |         |                                      |         |   |      |
|---------|---------------------|---------|--------------------------------------|---------|---|------|
| Huelva  | Huelva              | Rural   | Sede Los Álamos Diputación de Huelva | 106.67  | 9 | 0.49 |
| Huelva  | Huelva              | Urban   | IFAPA                                | 15.78   | 4 | 0.21 |
| Huelva  | San Juan del Puerto | Natural | Humedal Graveras de las Balastreras  | 103.20  | 9 | 0.58 |
| Huelva  | San Juan del Puerto | Rural   | Club Hipico Dolmen de Soto           | 27.73   | 7 | 0.71 |
| Huelva  | San Juan del Puerto | Urban   | Casa particular                      | 29.13   | 4 | 0.14 |
| Sevilla | Cañada              | Natural | Cañada de los Pájaros                | 488.56  | 6 | 0.58 |
| Sevilla | Cañada              | Rural   | Dehesa de Abajo                      | 293.44  | 8 | 0.45 |
| Sevilla | Cañada              | Urban   | La HAMPÁ                             | 18.11   | 8 | 0.62 |
| Sevilla | Guadaira            | Natural | La Loma del Acebuchar                | 110.94  | 8 | 0.52 |
| Sevilla | Guadaira            | Rural   | Estación anillamiento Río Guadaira   | 313.56  | 8 | 0.44 |
| Sevilla | Guadaira            | Urban   | Campus Pablo de Olavide              | 28.78   | 7 | 0.38 |
| Sevilla | Lantejuela          | Natural | Laguna del Gobierno                  | 74.60   | 7 | 0.15 |
| Sevilla | Lantejuela          | Rural   | Corral                               | 4.28    | 4 | 0.47 |
| Sevilla | Lantejuela          | Urban   | Piscina                              | 15.58   | 5 | 0.38 |
| Sevilla | Sevilla             | Natural | Parque El Alamillo                   | 18.86   | 5 | 0.60 |
| Sevilla | Sevilla             | Rural   | Escuela de Equitación "Espigares"    | 91.00   | 7 | 0.52 |
| Sevilla | Sevilla             | Urban   | Casa particular                      | 11.06   | 2 | 0.25 |
| Sevilla | Veta la Palma       | Natural | Isla de Tarfia (Veta la Palma)       | 816.33  | 9 | 0.11 |
| Sevilla | Veta la Palma       | Rural   | Cortijo Veta la Palma                | 3981.69 | 9 | 0.14 |
| Sevilla | Veta la Palma       | Urban   | Bar-Restaurante Estero (Isla Mayor)  | 89.06   | 7 | 0.58 |

**Supplementary Table S2** – Land use cover. The different categories are grouped into the four habitat classes included in the analyses.

| <b>Land use cover category</b>                               | <b>Habitat class</b> |
|--------------------------------------------------------------|----------------------|
| Paddy fields                                                 | Agricultural         |
| Annual crops associated with permanent crops                 | Agricultural         |
| Fruit trees                                                  | Agricultural         |
| Cultivation mosaics                                          | Agricultural         |
| Olive groves                                                 | Agricultural         |
| Mainly agricultural land with natural and semi-natural areas | Agricultural         |
| Permanently irrigated lands                                  | Agricultural         |
| Rainfed agricultural land                                    | Agricultural         |
| Vineyards                                                    | Agricultural         |
| Coniferous forests                                           | Forest               |
| Broadleaf forests                                            | Forest               |
| Mixed forests                                                | Forest               |
| Forest-to-thicket transition areas                           | Forest               |
| Agroforestry                                                 | Forest               |
| Rubbish dumps and landfills                                  | Urban                |
| Sports and recreational facilities                           | Urban                |
| Road and railway infrastructures and associated land         | Urban                |
| Continuous urban areas                                       | Urban                |
| Discontinuous urban areas                                    | Urban                |
| Mines and quarries                                           | Urban                |
| Construction sites                                           | Urban                |
| Industrial and commercial areas                              | Urban                |
| Ports and harbours                                           | Urban                |
| Urban parks and other green areas                            | Urban                |
| Waterways                                                    | Wetlands             |
| Estuaries                                                    | Wetlands             |
| Wetlands and marshes                                         | Wetlands             |
| Open water bodies                                            | Wetlands             |
| Heathland and mesophilic scrub                               | Wetlands             |
| Natural grassland                                            | Wetlands             |
| Beaches and sand-dunes                                       | Wetlands             |
| Saltworks                                                    | Wetlands             |
| Peat bogs and meadows                                        | Wetlands             |

**Supplementary Table S3** – Predictors included in (A) the GLMM and (B) RF models

used in this study. \*Landscape variables were calculated per each buffer.

| A)                    |                     |                                                        |                                                                                 |
|-----------------------|---------------------|--------------------------------------------------------|---------------------------------------------------------------------------------|
|                       | Variable type       | Variable name                                          | Description                                                                     |
| Factor                | Habitat category    | Category                                               | Three kind of habitats (natural, rural, urban), along an urbanization gradient. |
|                       |                     |                                                        |                                                                                 |
| Dependent variables   | Mosquitoes          | Abundance                                              | Total average mosquito captures per locality                                    |
|                       |                     | Richness                                               | Number of mosquito species per locality                                         |
|                       |                     | Diversity                                              | Simpson index per locality                                                      |
|                       |                     | <i>An. atroparvus</i>                                  | Total average <i>An. atroparvus</i> captures per locality                       |
|                       |                     | <i>Cx. modestus</i>                                    | Total average <i>Cx. modestus</i> captures per locality                         |
|                       |                     | <i>Cx. perexiguus</i>                                  | Total average <i>Cx. perexiguus</i> captures per locality                       |
|                       |                     | <i>Cx. theileri</i>                                    | Total average <i>Cx. theileri</i> captures per locality                         |
|                       |                     | <i>Cx. pipiens</i>                                     | Total average <i>Cx. pipiens</i> captures per locality                          |
|                       | <i>Oc. caspius</i>  | Total average <i>Oc. caspius</i> captures per locality |                                                                                 |
| B)                    |                     |                                                        |                                                                                 |
|                       | Variable type       | Variable name                                          | Description                                                                     |
| Independent variables | NDVI                | Spring                                                 | Mean spring Normalized Difference Vegetation Index                              |
|                       |                     | Summer                                                 | Mean summer Normalized Difference Vegetation Index                              |
|                       |                     | Autumn                                                 | Mean autumn Normalized Difference Vegetation Index                              |
|                       |                     | Winter                                                 | Mean winter Normalized Difference Vegetation Index                              |
|                       | Hydrology           | Water                                                  | Distance in meters to any type of water sources                                 |
|                       |                     | Coast                                                  | Distance in meters to the seacoast                                              |
|                       |                     | Rivers                                                 | Distance in meters to any river                                                 |
|                       |                     | Marshland                                              | Distance in meters to any type of saltmarsh                                     |
|                       |                     | Freshwater                                             | Distance in meters to any kind of stretch of freshwater                         |
|                       |                     | Water reservoirs                                       | Distance in meters to any kind of reservoirs                                    |
|                       | Landscape*          | Agricultural fields                                    | % of land covered by crops (log ratio transformed)                              |
|                       |                     | Forest                                                 | % of land covered by woods (log ratio transformed)                              |
|                       |                     | Urban land                                             | % of land covered by urban areas (log ratio transformed)                        |
|                       |                     | Wetlands                                               | % of land covered by wetlands (log ratio transformed)                           |
|                       | Human population    | Human density                                          | People per 250 m <sup>2</sup> of land area (ln transformed)                     |
|                       | Dependent variables | Mosquitoes                                             | Abundance                                                                       |
| Richness              |                     |                                                        | Number of mosquito species per locality                                         |
| Diversity             |                     |                                                        | Simpson index per locality                                                      |
| <i>An. atroparvus</i> |                     |                                                        | Total average <i>An. atroparvus</i> captures per locality                       |
| <i>Cx. modestus</i>   |                     |                                                        | Total average <i>Cx. modestus</i> captures per locality                         |
| <i>Cx. perexiguus</i> |                     |                                                        | Total average <i>Cx. perexiguus</i> captures per locality                       |
| <i>Cx. theileri</i>   |                     |                                                        | Total average <i>Cx. theileri</i> captures per locality                         |
| <i>Cx. pipiens</i>    |                     |                                                        | Total average <i>Cx. pipiens</i> captures per locality                          |
|                       | <i>Oc. caspius</i>  | Total average <i>Oc. caspius</i> captures per locality |                                                                                 |

**Supplementary Figure S1** – Partial dependence plot for *An. atroparvus* captures and: a) the summer NDVI; b) the percentage of land area covered by wetlands (log ratio transformed); c) the percentage of land area covered by urban land (log ratio transformed). Partial dependence plot for *Cx. modestus* captures and: d) the percentage of land area covered by wetlands (log ratio transformed); e) distance to marshland (m); f) the summer NDVI; g) the winter NDVI. Partial dependence plot for *Cx. perexiguus* captures and: h) the summer NDVI; i) the autumn NDVI; l) the percentage of land area covered by urban land (log ratio transformed). Partial dependence plot for *Oc. caspius* captures and: m) the distance to marshland (m); n) the percentage of land area covered by urban land log ratio transformed). Partial dependence is the dependence of the probability of presence of one predictor variable after averaging out the effects of the other predictor variables in the model.

*An. atroparvus* captures

a)

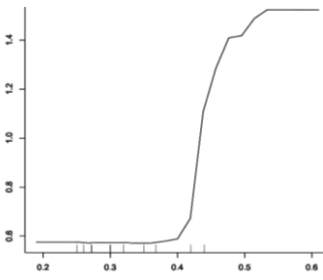

Summer NDVI

b)

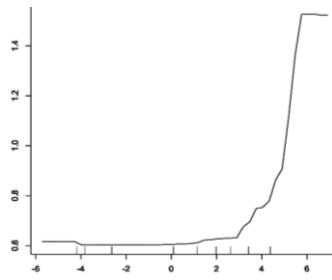

Wetland surface

c)

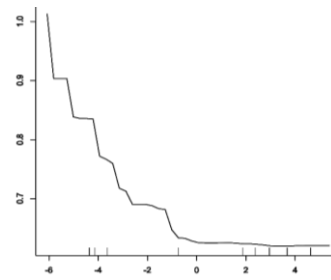

Urban land surface

*Cx. modestus* captures

d)

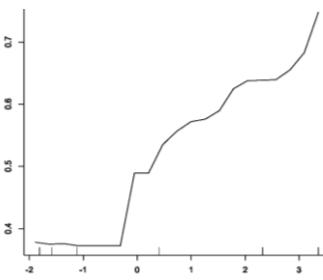

Wetland surface

e)

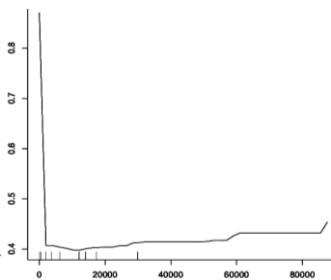

Distance to the marshland

f)

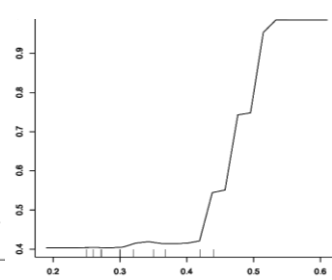

Summer NDVI

g)

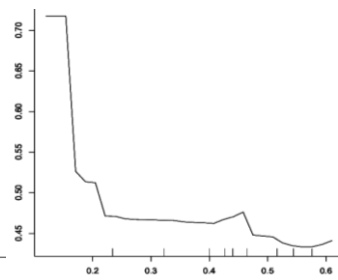

Winter NDVI

*Cx. perexiguus* captures

h)

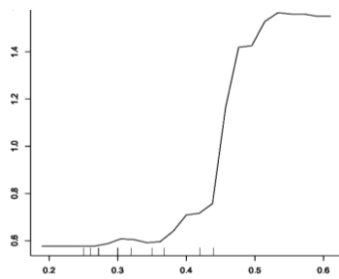

Summer NDVI

i)

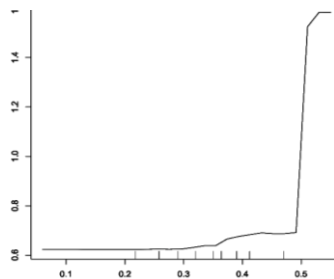

Autumn NDVI

l)

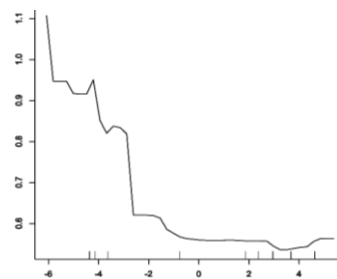

Urban land surface

*O. caspius* captures

m)

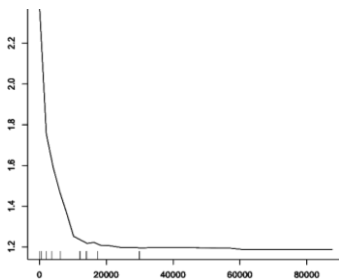

Distance to the marshland

n)

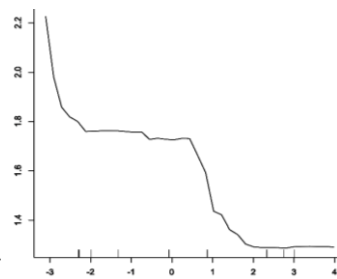

Urban land surface
